# Supplementary material for: Perioperative Thromboprophylaxis and Risk Factors for Thromboembolic Events in Meningioma Surgery: Findings From a Prospective Observational Study
Source: Research Square preprint supplement (doi:10.21203/rs.3.rs-8114288/v1), 2025-11-28
Supplement: Supplementary file 1 [file 7007e015941978f726f7082b.docx]

Surgery duration (min)

**node 0**

| mean | 243.16 |
| --- | --- |
| SD | 126.1 |
| n | 840 (100%) |

localization

p<0.001

**node 3**

| mean | 188.64 |
| --- | --- |
| SD | 80.5 |
| n | 293 (35.9%) |

**node 1**

| mean | 289.34 |
| --- | --- |
| SD | 144.06 |
| n | 423 (50.4%) |

*SB-AF: nm; NSB-AF: m; Intraventricular*

**node 2**

| mean | 214.45 |
| --- | --- |
| SD | 81.4 |
| n | 124 (14.8%) |

*SB-AF: m; SB-MF: m, nm; SB-PF: m, nm; NSB-PF: m; multiple; spinal*

*NSB-PF: nm;
NSB-AF: nm*

*tumor volume*

p<0.001

*tumor volume*

p<0.001

**node 8**

| mean | 197.02 |
| --- | --- |
| SD | 74.84 |
| n | 68 (8.1%) |

**node 9**

| mean | 239.46 |
| --- | --- |
| SD | 93.05 |
| n | 77 (9.2) |

**node 7**

| mean | 158.35 |
| --- | --- |
| SD | 59.45 |
| n | 148 (17.6%) |

**node 4**

| mean | 200.79 |
| --- | --- |
| SD | 101.87 |
| n | 90 (10.7%) |

**node 6**

| mean | 364.04 |
| --- | --- |
| SD | 167.23 |
| n | 149 (17.7%) |

**node 5**

| mean | 272.16 |
| --- | --- |
| SD | 107.2 |
| n | 184 (21.9%) |

*(18.400cm3, 35.400cm3)*

*>18.400cm3*

*<= 3.950cm3*

*<= 18.400cm3*

*>35.400cm3*

*(3.950cm3, 18.400cm3)*

*localization*

*p=0.022*

*localization*

*p=0.005*

**node 13**

| mean | 147.37 |
| --- | --- |
| SD | 51.05 |
| n | 75 (8.9%) |

**node 12**

| mean | 169.62 |
| --- | --- |
| SD | 66.46 |
| n | 73 (8.7%) |

**node 11**

| mean | 222.87 |
| --- | --- |
| SD | 68.09 |
| n | 54 (6.4%) |

**node 10**

| mean | 292.64 |
| --- | --- |
| SD | 113.83 |
| n | 130 (15.5%) |

*NSB-AF: nm*

*SB-AF: m; SB-MF: m; SB-PF: m, nm; NSB-PF: m; multiple; spinal*

*NSB-PF: nm*

*SB-MF: nm*
